# Supplementary material for: Host HSPD1 Translocation from Mitochondria to the Cytoplasm Induced by Streptococcus suis Serovar 2 Enolase Mediates Apoptosis and Loss of Blood–Brain Barrier Integrity
Source: MDPI journal article supplement (doi:10.3390/cells11132071), 2022-06-29
Supplement: s1 [file s1]

**Table S1.** The primers used in this study.

| Name                  | Primer sequences (5'–3')                                         |
|-----------------------|------------------------------------------------------------------|
| <i>HSPD1-F</i>        | TGACGATGACAAGCTTGC GGCCGCGATGCTTCGATTACCCG-CAGTC (pCMV-3×FLAG)   |
| <i>HSPD1-R</i>        | GAGGGGTCACAGGGGATGCCACCCGGTTAGAACATGCCAC-CTCCCATAC (pCMV-3×FLAG) |
| <i>ACTB-F</i>         | CGAGCTGTACAAGTCCGGACTCAGAATGGATGACGA-TATTGCT (pEGFP)             |
| <i>ACTB-R</i>         | GGGCCCCGCGGTACCGTTCGACTGCAGCTAGAAGCATTT-GCGGTG (pEGFP)           |
| <i>pET28a-HSPD1-F</i> | CGCGGATCCATGCTTCGGTTAC ( <i>Bam</i> H I)                         |
| <i>pET28a-HSPD1-R</i> | GGGAATTCCATATGTTAGAACATGCC ( <i>Nde</i> I)                       |
| <i>PBR-F</i>          | ACAGAGAAGGCTGTGGTTCC                                             |
| <i>PBR-R</i>          | CGCCATACGCAGTAGTTGAG                                             |
| <i>Bcl-2-F</i>        | GAGGATTGTGGCCTTCTTTG                                             |
| <i>Bcl-2-R</i>        | ACAGTCCACAAAGGCATCC                                              |
| <i>Bax-F</i>          | TTTGCTTCAGGGTTTCATCC                                             |
| <i>Bax-R</i>          | CAGTTGAAGTTGCCGTCAGA                                             |
| <i>GAPDH-F</i>        | GTCGGTTGTGGATCTGACCT                                             |
| <i>GAPDH-R</i>        | AGCTTGACGAAGTGGTCGTT                                             |

**Table S2.** The siRNA used for HSPD1 knockdown.

| Name        | Target sequences (5'–3')                                          |
|-------------|-------------------------------------------------------------------|
| HSPD1-siRNA | GCAGATGCTGTAGCTGTTA<br>GCTGTAATTGCTGAACTTA<br>CCAGCCTTGGATTCAATTA |

**Table S3.** The list of primary antibodies in this study.

| Protein name      | Primary antibodies                             | Brand                          | Dilution ratio for WB |
|-------------------|------------------------------------------------|--------------------------------|-----------------------|
| HSPD1             | HSP60 Polyclonal antibody (rabbit)             | Proteintech, USA               | 1:5000                |
| ACTB              | Actin (C-2) mouse monoclonal antibody (rabbit) | SANTA CRUZ BIO-TECHNOLOGY, USA | 1:1000                |
| GFP-tag           | GFP Tag Polyclonal Antibody (rabbit)           | Proteintech, USA               | 1: 4000               |
| FLAG-tag          | DYKDDDDK tag Monoclonal antibody (mouse)       | Proteintech, USA               | 1:2000                |
| His-tag           | 6*His, His-Tag Monoclonal Antibody (mouse)     | Proteintech, USA               | 1:5000                |
| Smac              | DIABLO Polyclonal Antibody (rabbit)            | Proteintech, USA               | 1:5000                |
| XIAP              | XIAP Monoclonal Antibody (mouse)               | Proteintech, USA               | 1:5000                |
| Cleaved caspase-3 | Cleaved Caspase-3 (Asp175) (5A1E) Rabbit mAb   | Cell Signaling Technology, USA | 1:1000                |

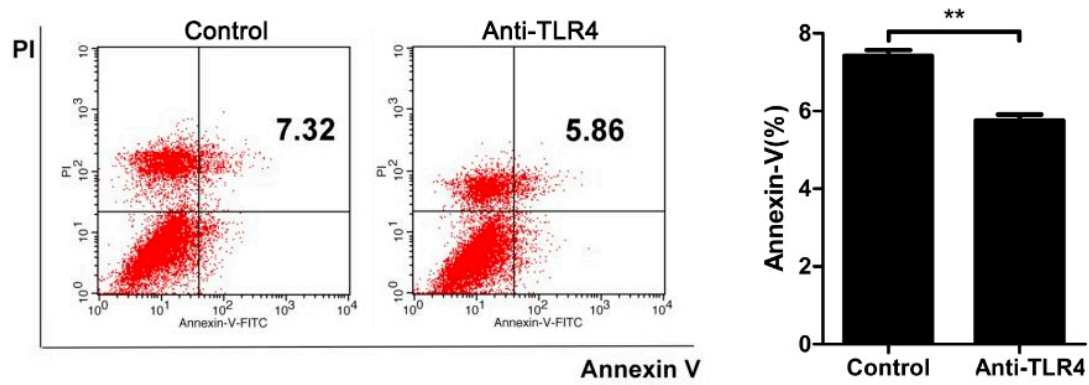

**Figure S1.** Extracellular HSPD1 induces apoptosis through TLR4. Extracellular blocking of TLR4 by anti-TLR4 antibody reduced the HSPD1-induced apoptosis. (TLR4: Toll-like receptor 4). (\*\*,  $p < 0.01$ ).

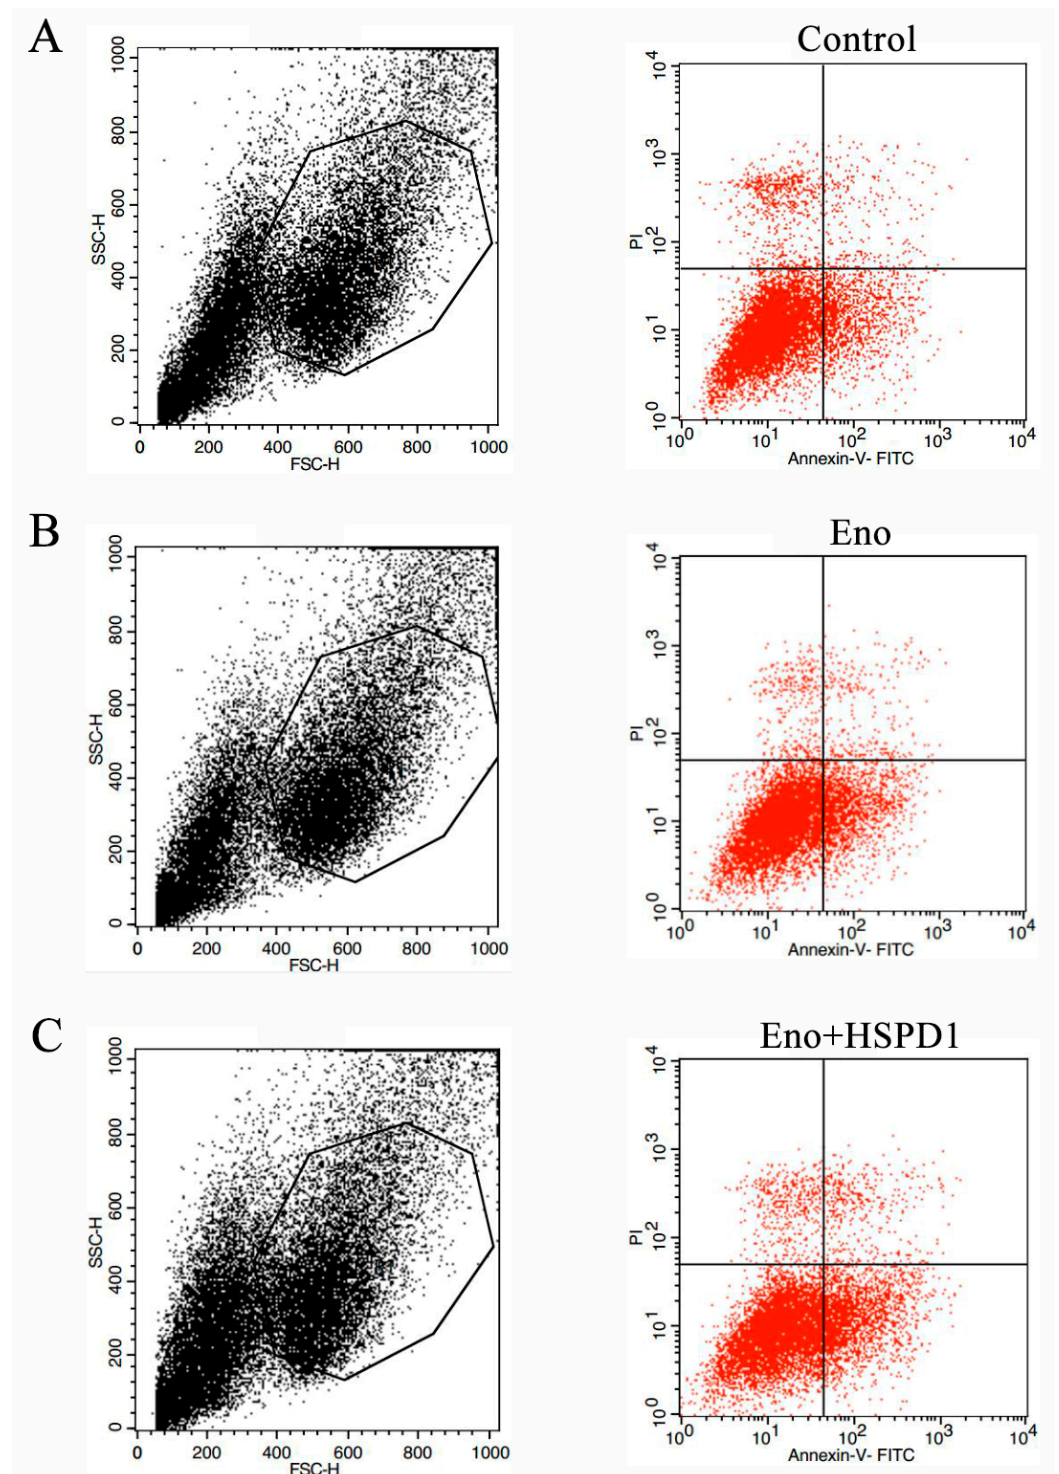

**Figure S2.** Gating strategies of flow cytometry for cell apoptosis detection. (A–C) correspond to the flow analyses in Figure 2A, respectively.

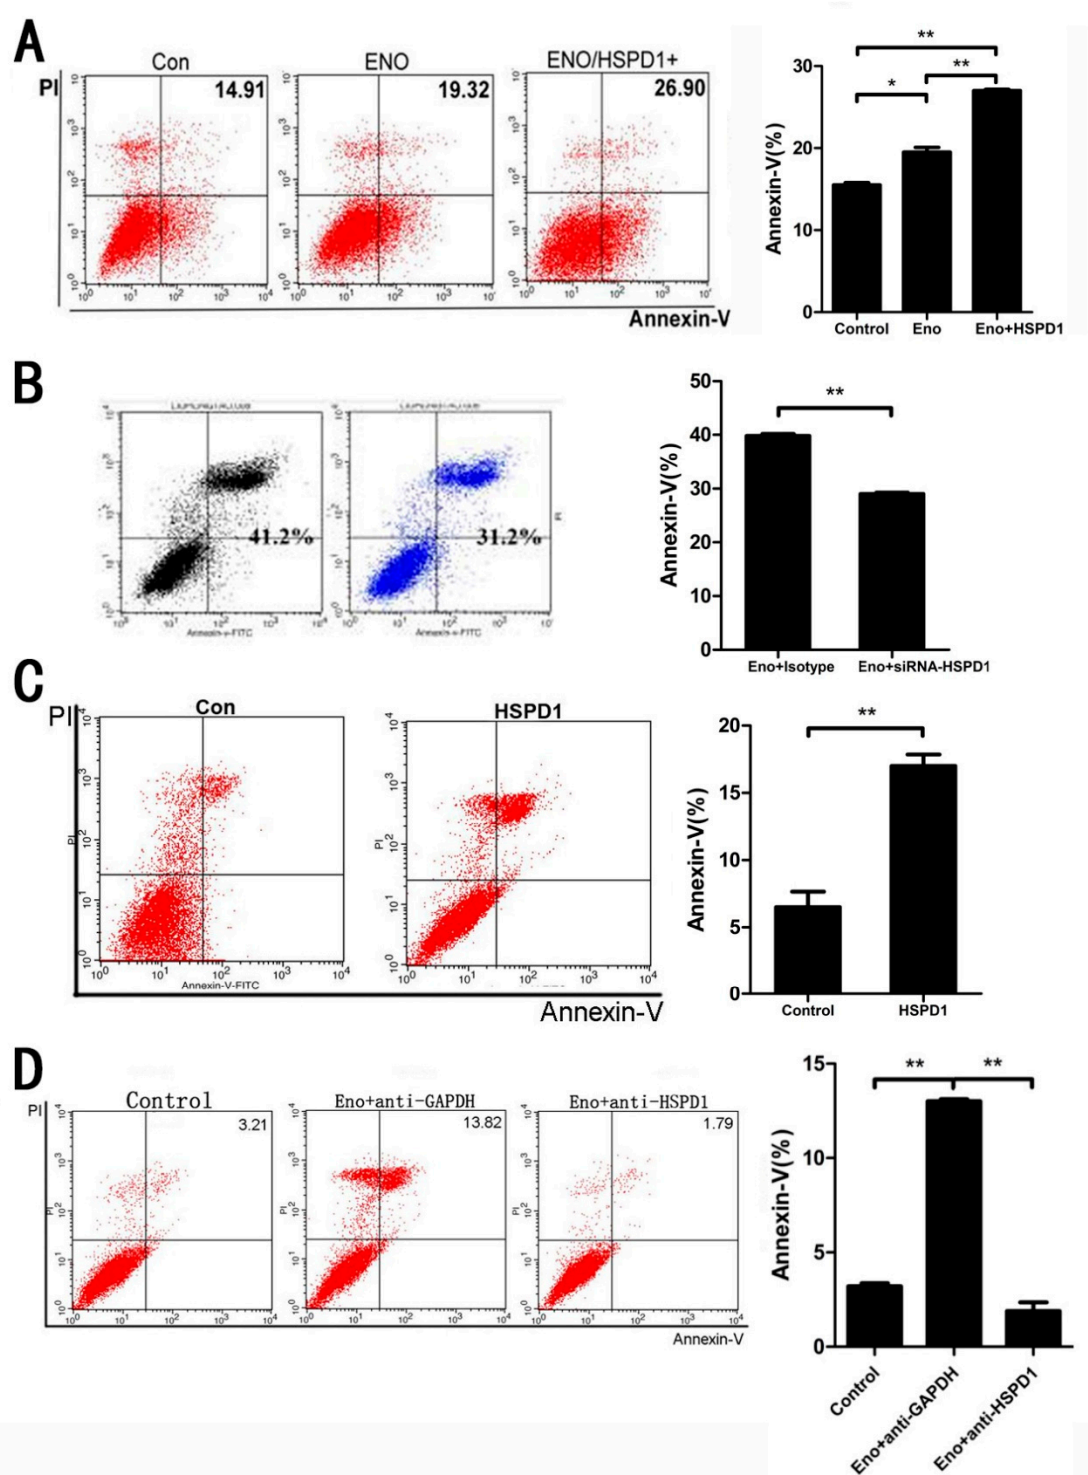

**Figure S3.** Scatter diagrams are used to analyze apoptosis levels. (A–D) correspond to (A–D) in Figure 2. (\*,  $p < 0.05$ ; \*\*,  $p < 0.01$ ).

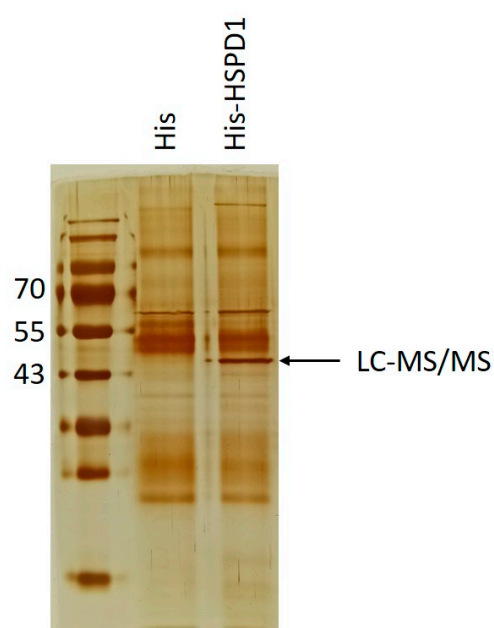

**Figure S4.** Silver staining result of pull-down to identify interactive proteins of HSPD1 intracellularly. The band of interest was cut and analyzed by LC-MS/MS.

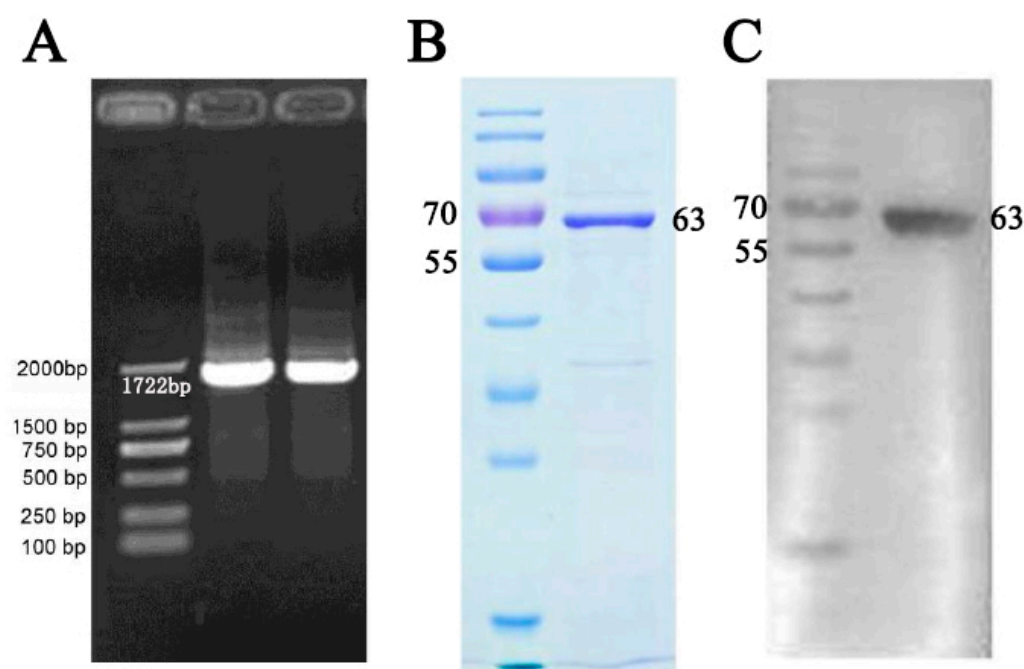

**Figure S5.** HSPD1 protein is correctly expressed and purified. (A) The amplified fragment of HSPD1 from constructed plasmid pET28a:HSPD1 had the predicted size of 1722 bp. (B) SDS-PAGE band of purified recombinant HSPD1 was at the correct size of 63 kDa. (C) Purified HSPD1 was detected by Western blotting with mouse anti-His-Tag as the primary antibody, which recognizes the 63 kDa band.
